# Supplementary material for: Discovery of Genomic Regions and Candidate Genes Controlling Root Development Using a Recombinant Inbred Line Population in Rapeseed (Brassica napus L.)
Source: MDPI journal article supplement (doi:10.3390/ijms23094781), 2022-04-26
Supplement: s1 [file s1]

**Figure S1**

| RHL  | chrA09_278361<br>92 (A9-1) | chrA09_27935<br>312 (A9-2) | chrA09_2818876<br>9 (A9-3) | chrA09_282214<br>66 (A9-4) | No. of F <sub>6</sub><br>lines |
|------|----------------------------|----------------------------|----------------------------|----------------------------|--------------------------------|
| R4   | H                          | H                          | H                          | H                          | 7                              |
| R19  | H                          | H                          | H                          | H                          | 10                             |
| R26  | H                          | H                          | H                          | H                          | 9                              |
| R41  | A                          | H                          | H                          | H                          | 9                              |
| R48  | H                          | H                          | B                          | B                          | 9                              |
| R78  | H                          | H                          | H                          | H                          | 10                             |
| R159 | H                          | H                          | H                          | H                          | 9                              |
| R183 | H                          | H                          | H                          | H                          | 8                              |

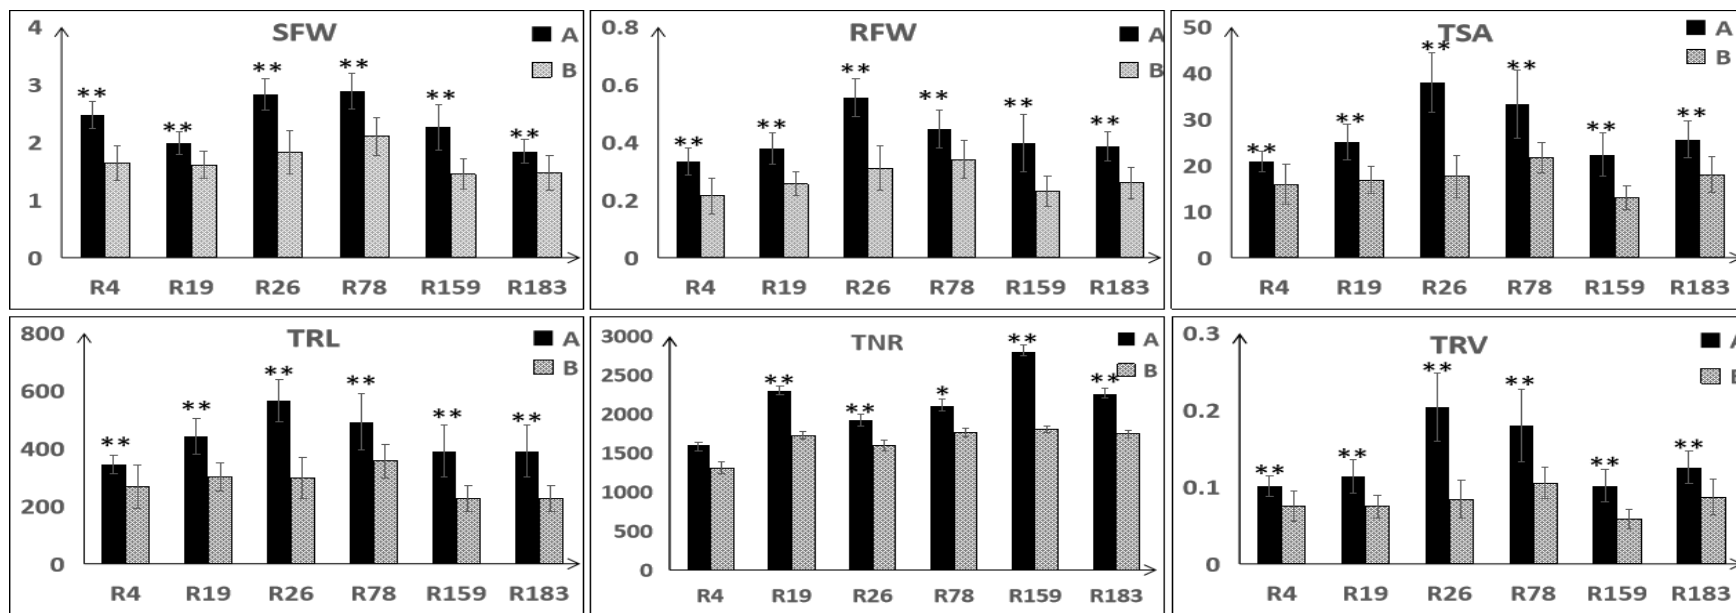

Figure S2

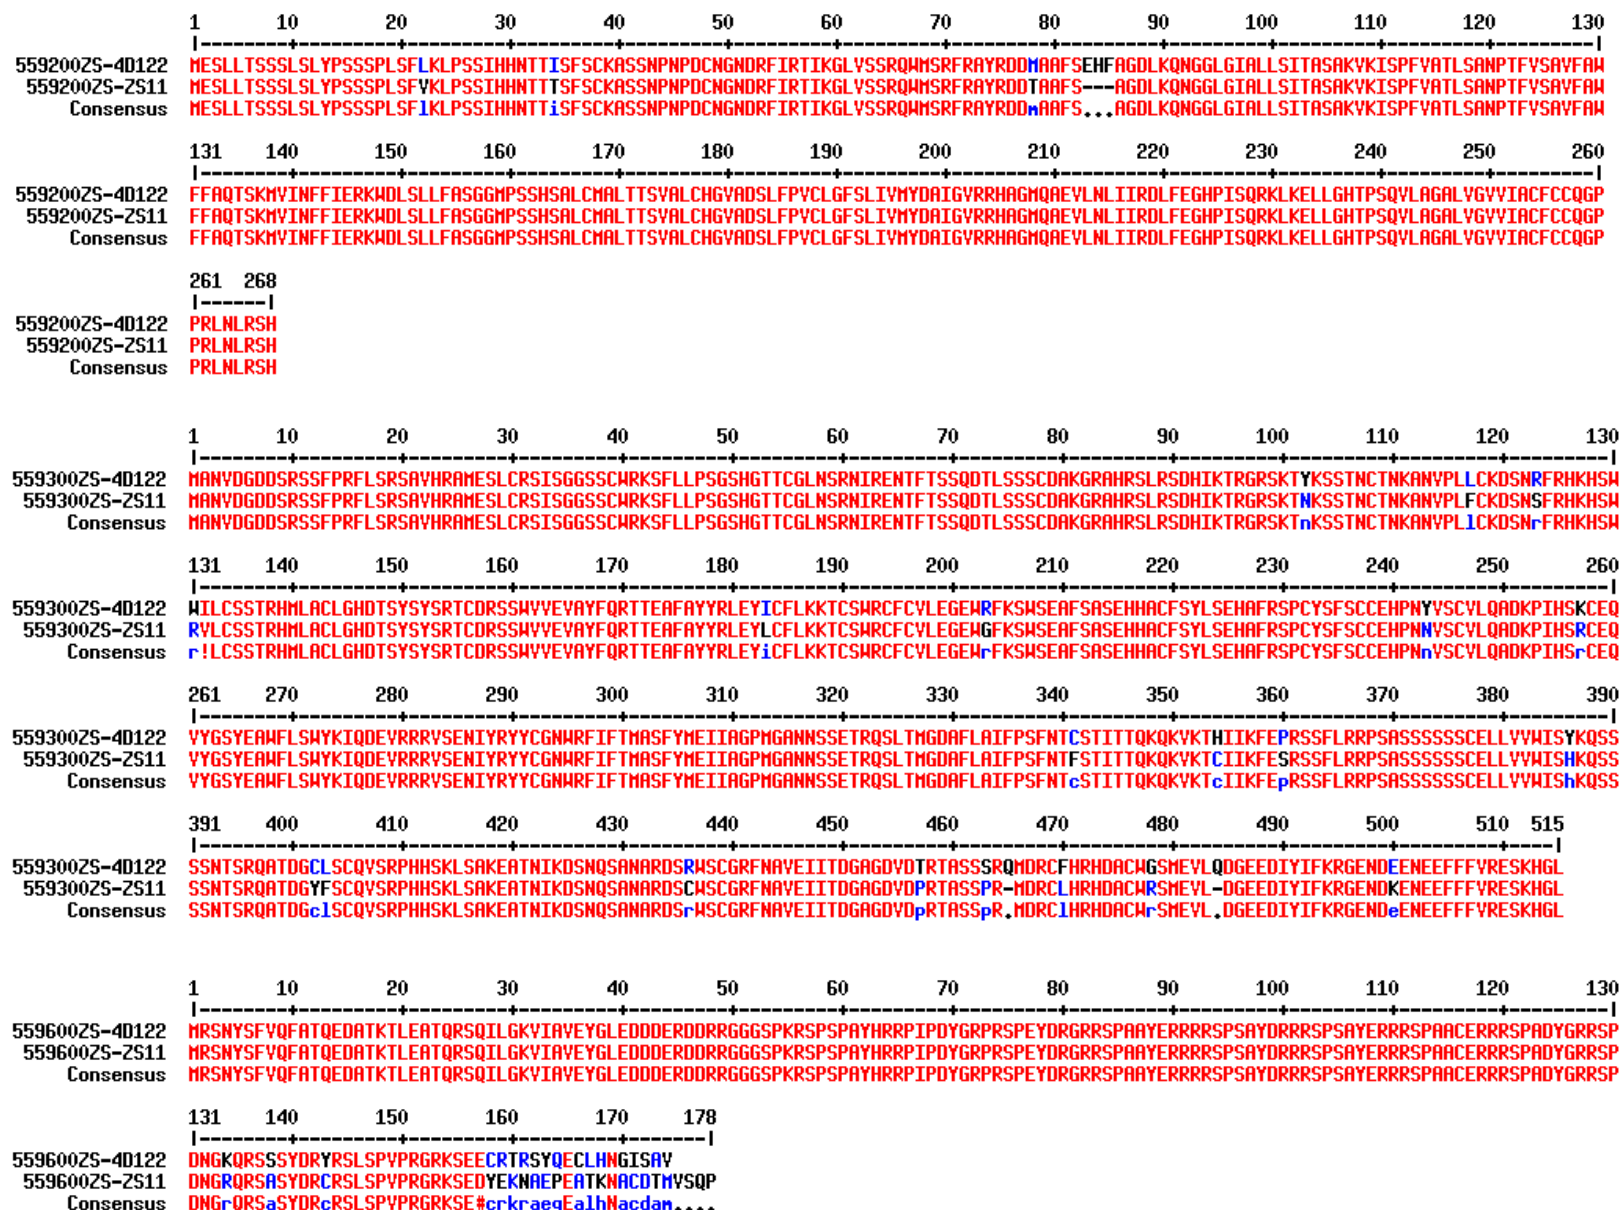

The sequence comparisons of amino acids for the three candidate genes.

**Figure S3**

**A**

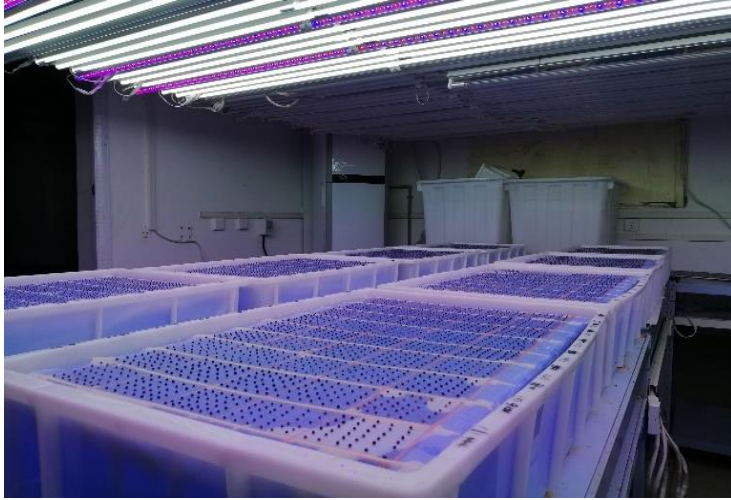

**B**

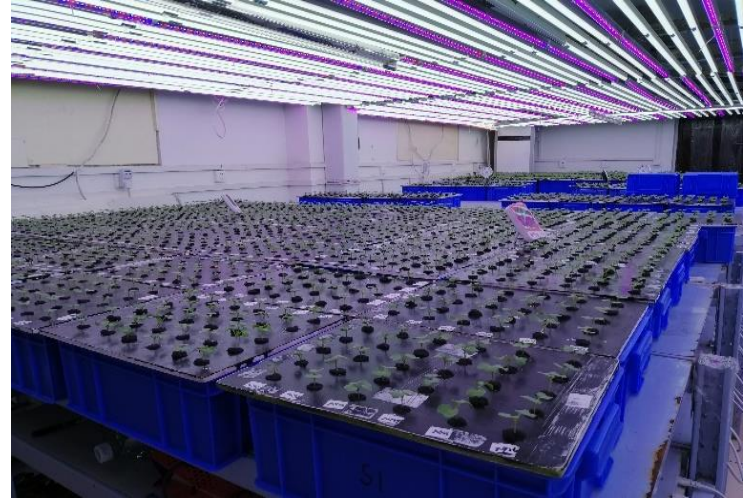

**C**

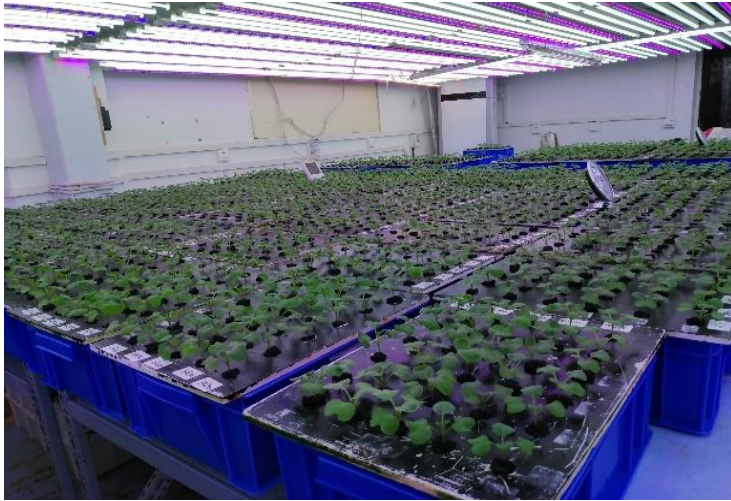

**D**

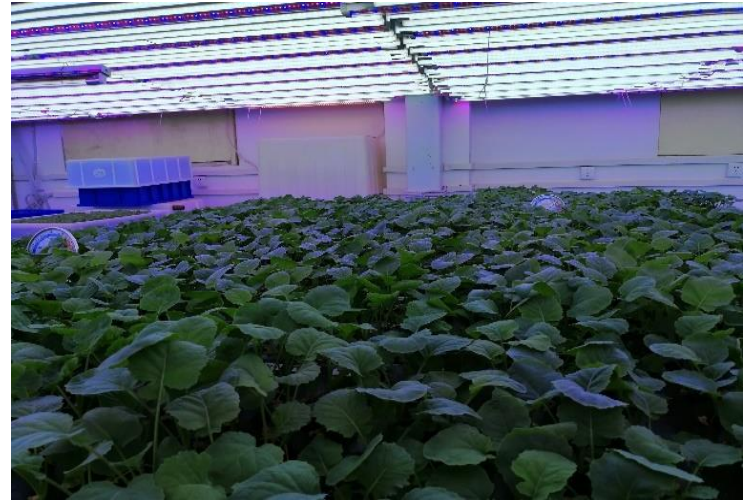

Growing of plants at different stages (A) Materials sowed on germination device (germination stage). (B) Plants in the growth device six days after transplantation (transplanting stage). (C) Plants in the growth device at 1/2 changing solution (tiny blue plastic basin). (D) Plants at sampling stage (18 days old seedlings)
