# Supplementary material for: Discovery of Genomic Regions and Candidate Genes Controlling Root Development Using a Recombinant Inbred Line Population in Rapeseed (Brassica napus L.)
Source: Int J Mol Sci. 2022 Apr 26;23(9):4781. doi: 10.3390/ijms23094781 (PMC9102059; doi:10.3390/ijms23094781)
Supplement: Supplementary file 1 [file ijms-23-04781-s001.zip › ijms-1680315-supplementary.xls]

## Sheet: Table S1
Table S1: Basic information on the genetic map of RIL population
Linkage group	Number of SNPs	Original bin number	Number of bin in the map	Genetic distance (cM)	Average distance (cM)	Maximum gap (cM)
A01	300	86	80	77.549	0.981633	8.216
A02	330	128	118	101.535	0.867821	11.355
A03	515	187	135	68.621	0.512097	3.635
A04	240	86	85	63.068	0.75081	9.353
A05	432	144	135	90.41	0.674701	5.277
A06	457	168	167	121.666	0.732928	4.99
A07	286	94	94	93.707	1.0076	8.206
A08	351	99	94	74.74	0.803677	5.118
A09	382	145	130	130.556	1.01206	22.861
A10	362	83	80	69.98	0.885848	4.222
A genome	3655	1220	1118	891.83	0.797701	-
C01	258	86	85	97.589	1.16177	12.093
C02	390	53	50	70.285	1.43439	10.471
C03	779	161	147	134.837	0.923541	12.021
C04	1194	143	141	153.527	1.09662	10.652
C05	247	95	88	115.498	1.32756	16.622
C06	454	88	77	49.628	0.653	3.43
C07	515	153	147	113.488	0.777315	7.995
C08	818	134	130	99.356	0.770202	10.376
C09	393	114	106	99.99	0.952286	7.276
C genome	5048	1027	971	934.2	0.962101	-
Total	8703	2247	2089	1826.03	0.874117	-

## Sheet: Table S2
Table S2: Correlation coefficients of genetic distances and physical distances of the markers in the linkage groups (P < 0.0001).
Linkage groups	Correlation coefficients
A01	0.954****
A02	0.955****
A03	0.997****
A04	0.959****
A05	0.940****
A06	0.964****
A07	0.986****
A08	0.948****
A09	0.987****
A10	0.915****
C01	0.926****
C02	0.982****
C03	0.979****
C04	0.984****
C05	0.960****
C06	0.992****
C07	0.962****
C08	0.957****
C09	0.937****
Average coefficient	0.962

## Sheet: Table S3
Table S3: Summary of all detected QTLs in the RIL population
Trait	QTL	Exp	Chr	Pos	LOD	Adda	R2（%）	LOD2_L	LOD2_R
RFW	qRFW-A01-1	1	A01	13.61	5.22476	-0.0296	8.8314	6.4	18.1
	qRFW-A09-1	3	A09	106.51	6.88165	-0.0253	10.7958	103.6	106.9
	qRFW-A09-2	4	A09	103.91	4.95331	-0.0308	7.2419	97.7	107.3
	qRFW-A09-3	3	A09	113.11	4.60369	-0.0204	7.3877	112.8	115
	qRFW-C01-1	1	C01	35.31	3.65038	0.0239	5.731	34.3	43.6
	qRFW-C06-1	3	C06	32.51	3.61781	0.0165	5.5184	30.6	35.8
	qRFW-C08-1	4	C08	0.01	3.57655	-0.0262	5.2004	0	1.3
	qRFW-C08-2	4	C08	40.41	7.37242	0.0381	11.3729	38.4	42.2
SFW	qSFW-A04-1	2	A04	59.31	4.16721	-0.1393	5.9077	52.4	59.6
	qSFW-A09-1	3	A09	105.41	5.5114	-0.0934	8.6475	101.8	106.9
	qSFW-A09-2	3	A09	98.31	3.65255	-0.072	5.7219	93.5	98.5
	qSFW-A09-3	4	A09	91.71	4.47774	-0.1803	7.7274	88	96.7
	qSFW-C01-1	1	C01	25.11	4.12812	0.1247	6.0406	17.5	34
	qSFW-C03-1	1	C03	115.41	4.20413	-0.1273	6.2525	113.3	122.1
	qSFW-C03-2	2	C03	115.61	5.37025	-0.1511	7.7899	114.1	119.8
	qSFW-C03-3	3	C03	90.81	3.58958	-0.0684	5.4292	86.9	93.6
	qSFW-C03-4	3	C03	96.41	3.55483	-0.0681	5.3474	94.2	98.9
	qSFW-C08-1	3	C08	33.11	3.09012	0.0702	4.6295	31.9	39
	qSFW-C08-2	2	C08	30.71	3.34419	0.1221	4.9087	23.6	31.9
	qSFW-C08-3	4	C08	36.41	6.95331	0.206	10.6979	34.5	39.7
	qSFW-C08-4	2	C08	36.41	4.69055	0.1402	6.5957	34.5	39.1
RSR	qRSR-A10-1	2	A10	47.01	6.16069	-0.0077	9.2662	46.6	48.7
	qRSR-C04-1	2	C04	133.91	4.08469	-0.0062	6.0523	127.1	136.2
	qRSR-C04-2	2	C04	142.91	3.53095	-0.0058	5.2574	140.7	145
	qRSR-C04-3	3	C04	60.11	3.95874	-0.0079	6.4349	59.9	61.3
	qRSR-C04-4	3	C04	73.31	4.1759	-0.0081	6.7732	71.5	79
	qRSR-C08-1	4	C08	95.31	3.62866	0.006	5.8673	93.2	98.3
TRL	qTRL-A01-1	1	A01	4.71	4.27362	-41.2743	6.8736	4	6.2
	qTRL-A01-2	1	A01	16.31	5.76982	-47.9949	9.3109	8.3	20.3
	qTRL-A10-1	2	A10	42.31	4.14549	-35.3822	6.1655	39.3	45.8
	qTRL-C02-1	1	C02	61.31	3.32248	-38.1489	5.7094	57.2	69.1
	qTRL-C08-1	1	C08	85.31	3.56352	36.4579	5.3354	82.7	88
	qTRL-C08-2	3	C08	34.11	3.53746	26.1754	5.5837	29.9	39.7
	qTRL-C08-3	4	C08	40.41	5.24864	55.0201	8.2949	35.3	43.2
TSA	qTSA-A01-1	1	A01	10.61	4.62758	-2.6802	7.622	6.2	18
	qTSA-A09-1	3	A09	107.51	5.28556	-2.2537	8.2993	101	109.4
	qTSA-A09-2	4	A09	103.91	4.56895	-3.0687	6.8088	97.8	106.9
	qTSA-A10-1	2	A10	42.31	5.46145	-3.0551	8.3823	40.3	45
	qTSA-C01-1	1	C01	36.31	4.76873	2.7119	7.9127	34.3	43.4
	qTSA-C06-1	3	C06	32.51	3.26167	1.5859	4.9926	30.6	37.5
	qTSA-C08-1	4	C08	0.01	3.57003	-2.7385	5.334	0	1.3
	qTSA-C08-2	4	C08	5.91	3.27036	-2.649	4.8958	5.6	12.1
	qTSA-C08-3	4	C08	40.41	7.55266	4.1112	11.8548	37.5	41.5
TRV	qTRV-A09-1	3	A09	107.51	5.7785	-0.013	9.0919	106.9	110.3
	qTRV-A09-2	4	A09	104.91	6.5038	-0.0208	9.918	98.3	106.8
	qTRV-C01-1	1	C01	34.01	5.45277	0.017	8.5911	33.1	41
	qTRV-C01-2	2	C01	54.11	3.63084	0.0174	5.439	48.9	59.9
	qTRV-C04-1	2	C04	133.91	3.61781	-0.0174	5.464	125.5	136.2
	qTRV-C08-1	2	C08	42.11	4.47123	0.0194	6.738	41.5	44.8
	qTRV-C08-2	4	C08	40.41	9.00543	0.0243	14.1194	38.2	41.7
	qTRV-C08-3	4	C08	0.01	3.57003	-0.015	5.2275	0	1.3
	qTRV-C09-1	1	C09	56.91	3.9088	0.0144	6.1914	49.3	59
TNR	qTNR-A03-1	2	A03	9.41	4.33008	42.3372	6.6051	3.5	11.4
	qTNR-A08-1	2	A08	65.61	5.78285	47.6399	8.8896	63.9	66.8
	qTNR-C02-1	1	C02	59.31	3.81759	-67.4559	6.5601	57.2	69
PRL	qPRL-A01-1	1	A01	26.51	4.44517	-0.8046	6.3419	22.3	27.6
	qPRL-A01-2	3	A01	30.21	4.67535	-1.2338	7.1161	24.9	32.9
	qPRL-A01-3	1	A01	36.81	4.04995	-0.8292	6.7064	33.8	40.5
	qPRL-A01-4	2	A01	49.11	5.45494	-1.1002	6.816	41.8	51.7
	qPRL-A03-1	2	A03	12.11	7.94137	1.3888	10.2387	11.4	13.7
	qPRL-A03-2	2	A03	19.51	4.74919	1.1045	6.3114	18	20.6
	qPRL-C02-1	1	C02	21.41	3.69381	-0.7566	5.4274	17.2	26.8
	qPRL-C02-2	2	C02	21.41	3.31379	-0.8701	4.1617	18.4	33.3
	qPRL-C08-1	1	C08	95.01	9.0228	1.198	13.8643	94	95.3
	qPRL-C08-2	2	C08	98.31	7.78502	1.4007	10.7378	94	99.3
	qPRL-C08-3	2	C08	88.31	7.62866	1.3392	10.0321	86.8	88.5
	qPRL-C08-4	2	C08	93.31	7.77633	1.3731	10.4956	88.5	94
	qPRL-C08-5	2	C08	82.71	4.98154	1.105	6.711	79.9	82.8
RDW	qRDW-A09-1	3	A09	98.31	4.39305	-0.8034	7.1452	91.8	98.5
	qRDW-A09-2	3	A09	105.41	6.76004	-1.0358	10.8432	103.8	107.3
	qRDW-C01-1	1	C01	33.11	5.99566	1.4425	9.7376	27.5	35.3
	qRDW-C01-2	1	C01	39.31	5.55266	1.547	11.2201	35.3	43.5
	qRDW-C04-1	2	C04	44.41	3.39848	-1.159	5.4528	40.9	54.2
SDW	qSDW-A09-1	1	A09	6.61	3.50706	-0.0087	4.9311	5.8	8.6
	qSDW-A09-2	3	A09	8.81	4.16287	-0.0046	6.4506	6.2	10.8
	qSDW-A09-3	1	A09	105.41	4.1759	-0.0104	6.0868	98.5	106.9
	qSDW-A09-4	4	A09	103.91	5.11618	-0.0119	7.6851	98.5	106.9
	qSDW-A09-5	3	A09	105.41	4.48208	-0.0052	7.1745	103.5	109.6
	qSDW-A09-6	4	A09	98.31	5.65689	-0.0121	8.3696	97.3	98.5
	qSDW-C02-1	1	C02	13.41	4.66449	0.0101	6.6613	10.4	16.8
	qSDW-C02-2	2	C02	13.21	4.03257	0.0099	5.9372	10.1	14.6
	qSDW-C03-1	1	C03	110.21	5.63735	-0.0111	8.273	107.2	115.7
	qSDW-C03-2	2	C03	108.81	6.01954	-0.0119	9.1397	102.9	109.2
	qSDW-C03-3	2	C03	100.71	3.93268	-0.0097	6.0568	100.6	101.1
	qSDW-C03-4	1	C03	100.01	4.76222	-0.0102	6.9693	99.9	101.1
	qSDW-C08-1	4	C08	40.41	4.82736	0.011	7.1798	36.9	42.1
a: Positive and negative values represented corresponding QTLs carried the favorable alleles from 4D122 and ZS11, respectively.

## Sheet: Table S4
Table S4: Information of QTL clusters in the RIL population.
QTL Cluster	QTL Cluster Type	QTL	Exp	Chr	Pos	LOD	Adda	R2（%）	LOD2_L	LOD2_R
qcA01-1	root-specific	qTSA-A01-1	1	A01	10.61	4.62758	-2.6802	7.622	6.2	18
		qRFW-A01-1	1	A01	13.61	5.22476	-0.0296	8.8314	6.4	18.1
		qTRL-A01-2	1	A01	16.31	5.76982	-47.9949	9.3109	8.3	20.3
qcA01-2	root-specific	qPRL-A01-1	1	A01	26.51	4.44517	-0.8046	6.3419	22.3	27.6
		qPRL-A01-2	3	A01	30.21	4.67535	-1.2338	7.1161	24.9	32.9
qcA09-1	shoot-specific	qSDW-A09-1	1	A09	6.61	3.50706	-0.0087	4.9311	5.8	8.6
		qSDW-A09-2	3	A09	8.81	4.16287	-0.0046	6.4506	6.2	10.8
qcA09-2	root and shoot common	qSFW-A09-3	4	A09	91.71	4.47774	-0.1803	7.7274	88	96.7
		qSFW-A09-2	3	A09	98.31	3.65255	-0.072	5.7219	93.5	98.5
		qRDW-A09-1	3	A09	98.31	4.39305	-0.8034	7.1452	91.8	98.5
		qSDW-A09-6	4	A09	98.31	5.65689	-0.0121	8.3696	97.3	98.5
		qRFW-A09-2	4	A09	103.91	4.95331	-0.0308	7.2419	97.7	107.3
		qTSA-A09-2	4	A09	103.91	4.56895	-3.0687	6.8088	97.8	106.9
		qSDW-A09-4	4	A09	103.91	5.11618	-0.0119	7.6851	98.5	106.9
		qTRV-A09-2	4	A09	104.91	6.5038	-0.0208	9.918	98.3	106.8
		qSFW-A09-1	3	A09	105.41	5.5114	-0.0934	8.6475	101.8	106.9
		qRDW-A09-2	3	A09	105.41	6.76004	-1.0358	10.8432	103.8	107.3
		qSDW-A09-3	1	A09	105.41	4.1759	-0.0104	6.0868	98.5	106.9
		qSDW-A09-5	3	A09	105.41	4.48208	-0.0052	7.1745	103.5	109.6
		qRFW-A09-1	3	A09	106.51	6.88165	-0.0253	10.7958	103.6	106.9
		qTSA-A09-1	3	A09	107.51	5.28556	-2.2537	8.2993	101	109.4
		qTRV-A09-1	3	A09	107.51	5.7785	-0.013	9.0919	106.9	110.3
qcA10-1	root-specific	qTRL-A10-1	2	A10	42.31	4.14549	-35.3822	6.1655	39.3	45.8
		qTSA-A10-1	2	A10	42.31	5.46145	-3.0551	8.3823	40.3	45
qcC01-1	root and shoot common	qSFW-C01-1	1	C01	25.11	4.12812	0.1247	6.0406	17.5	34
		qRDW-C01-1	1	C01	33.11	5.99566	1.4425	9.7376	27.5	35.3
		qTRV-C01-1	1	C01	34.01	5.45277	0.017	8.5911	33.1	41
		qRFW-C01-1	1	C01	35.31	3.65038	0.0239	5.731	34.3	43.6
		qTSA-C01-1	1	C01	36.31	4.76873	2.7119	7.9127	34.3	43.4
		qRDW-C01-2	1	C01	39.31	5.55266	1.547	11.2201	35.3	43.5
qcC02-1	shoot-specific	qSDW-C02-2	2	C02	13.21	4.03257	0.0099	5.9372	10.1	14.6
		qSDW-C02-1	1	C02	13.41	4.66449	0.0101	6.6613	10.4	16.8
qcC02-2	root-specific	qPRL-C02-1	1	C02	21.41	3.69381	-0.7566	5.4274	17.2	26.8
		qPRL-C02-2	2	C02	21.41	3.31379	-0.8701	4.1617	18.4	33.3
qcC02-3	root-specific	qTNR-C02-1	1	C02	59.31	3.81759	-67.4559	6.5601	57.2	69
		qTRL-C02-1	1	C02	61.31	3.32248	-38.1489	5.7094	57.2	69.1
qcC03-1	shoot-specific	qSFW-C03-3	3	C03	90.81	3.58958	-0.0684	5.4292	86.9	93.6
		qSFW-C03-4	3	C03	96.41	3.55483	-0.0681	5.3474	94.2	98.9
		qSDW-C03-4	1	C03	100.01	4.76222	-0.0102	6.9693	99.9	101.1
		qSDW-C03-3	2	C03	100.71	3.93268	-0.0097	6.0568	100.6	101.1
		qSDW-C03-2	2	C03	108.81	6.01954	-0.0119	9.1397	102.9	109.2
		qSDW-C03-1	1	C03	110.21	5.63735	-0.0111	8.273	107.2	115.7
		qSFW-C03-1	1	C03	115.41	4.20413	-0.1273	6.2525	113.3	122.1
		qSFW-C03-2	2	C03	115.61	5.37025	-0.1511	7.7899	114.1	119.8
qcC04-1	root and shoot common	qRSR-C04-1	2	C04	133.91	4.08469	-0.0062	6.0523	127.1	136.2
		qTRV-C04-1	2	C04	133.91	3.61781	-0.0174	5.464	125.5	136.2
qcC06-1	root-specific	qRFW-C06-1	3	C06	32.51	3.61781	0.0165	5.5184	30.6	35.8
		qTSA-C06-1	3	C06	32.51	3.26167	1.5859	4.9926	30.6	37.5
qcC08-1	root-specific	qRFW-C08-1	4	C08	0.01	3.57655	-0.0262	5.2004	0	1.3
		qTSA-C08-1	4	C08	0.01	3.57003	-2.7385	5.334	0	1.3
		qTRV-C08-3	4	C08	0.01	3.57003	-0.015	5.2275	0	1.3
qcC08-2	root and shoot common	qSFW-C08-1	3	C08	33.11	3.09012	0.0702	4.6295	31.9	39
		qTRL-C08-2	3	C08	34.11	3.53746	26.1754	5.5837	29.9	39.7
		qSFW-C08-3	4	C08	36.41	6.95331	0.206	10.6979	34.5	39.7
		qSFW-C08-4	2	C08	36.41	4.69055	0.1402	6.5957	34.5	39.1
		qRFW-C08-2	4	C08	40.41	7.37242	0.0381	11.3729	38.4	42.2
		qTRL-C08-3	4	C08	40.41	5.24864	55.0201	8.2949	35.3	43.2
		qTSA-C08-3	4	C08	40.41	7.55266	4.1112	11.8548	37.5	41.5
		qTRV-C08-2	4	C08	40.41	9.00543	0.0243	14.1194	38.2	41.7
		qSDW-C08-1	4	C08	40.41	4.82736	0.011	7.1798	36.9	42.1
		qTRV-C08-1	2	C08	42.11	4.47123	0.0194	6.738	41.5	44.8
qcC08-3	root and shoot common	qPRL-C08-5	2	C08	82.71	4.98154	1.105	6.711	79.9	82.8
		qTRL-C08-1	1	C08	85.31	3.56352	36.4579	5.3354	82.7	88
		qPRL-C08-3	2	C08	88.31	7.62866	1.3392	10.0321	86.8	88.5
		qPRL-C08-4	2	C08	93.31	7.77633	1.3731	10.4956	88.5	94
		qPRL-C08-1	1	C08	95.01	9.0228	1.198	13.8643	94	95.3
		qRSR-C08-1	4	C08	95.31	3.62866	0.006	5.8673	93.2	98.3
		qPRL-C08-2	2	C08	98.31	7.78502	1.4007	10.7378	94	99.3

## Sheet: Table S5
Table S5: The PARMS markers used in this study.
QTL clusters	Marker Name	Type	Position in ZS11	Primer No	Sequence (5' to 3')
qcA09-2	A9-1 (chrA09_27836192)	SNP	57185925	Ft	GAAGGTGACCAAGTTCATGCTCTGCCACCAAAACGATCCTT
				Fc	GAAGGTCGGAGTCAACGGATTCTGCCACCAAAACGATCCTC
				R	ATTGGAGCCGTTGAATGTTATTAT
	A9-2 (chrA09_27935312)	SNP	57302772	Ft	GAAGGTGACCAAGTTCATGCTTCTAAGATACAACTCGTCTACAATTTATTAT
				Fc	GAAGGTCGGAGTCAACGGATTTCTAAGATACAACTCGTCTACAATTTATTAG
				R	AGTTACTGAGTTTCAAAGAACACTAAAAT
	A9-3 (chrA09_28188769)	SNP	57592053	Ft	GAAGGTGACCAAGTTCATGCTAATCCTTATAACCAGAACCGAAGAT
				Fc	GAAGGTCGGAGTCAACGGATTAATCCTTATAACCAGAACCGAAGAG
				R	TGGTTCTTCTACGTCTGTTACACCT
	A9-4 (chrA09_28221466)	SNP	57628251	Ft	GAAGGTGACCAAGTTCATGCTCAATGGTAAGAAGTATTCATTATTCATTA
				Fc	GAAGGTCGGAGTCAACGGATTAATGGTAAGAAGTATTCATTATTCATTG
				R	TTGAGCAACGAGCATGTATATACTT
	A9-57272	In/Del	57272445	Ft	GAAGGTGACCAAGTTCATGCTGTGGCTATCACCAGGTTTGTTTA
				Fc	GAAGGTCGGAGTCAACGGATTTGGCTATCACCAGGTTTGTTTG
				R	ACCAAATTTAGCAAGTCATGTAACC
	A9-57296	In/Del	57296214	Ft	GAAGGTGACCAAGTTCATGCTGAGGAGGTTAGCTTCCAACCG
				Fc	GAAGGTCGGAGTCAACGGATTTGAGGAGGTTAGCTACAAACCA
				R	GCATAAAGTTACATAATGAAAGAGAAAGC
	A9-57329	In/Del	57329409	Ft	GAAGGTGACCAAGTTCATGCTAATTATTGGGTTTCAGATCTTTATACTT
				Fc	GAAGGTCGGAGTCAACGGATTAATTATTGGGTTTCAGATCTTTATACTG
				R	GAAAATCATATGTTTTATTAATCTGTGTG
	A9-57418	SNP	57418673	Ft	GAAGGTGACCAAGTTCATGCTAAACAGAAGCGTTTGTGGAAAG
				Fc	GAAGGTCGGAGTCAACGGATTAAACAGAAGCGTTTGTGGAAAC
				R	CGCCGCCCTGACCAG
	A9-57431	In/Del	57431760	Ft	GAAGGTGACCAAGTTCATGCTGTTTCGTTCTTCTCTCTCTGCCTA
				Fc	GAAGGTCGGAGTCAACGGATTTTCGTTCTTCTCTCTCTGCCTT
				R	CGGATCTTTAGTTGAACCAACC
	A9-57437	In/Del	57437729	Ft	GAAGGTGACCAAGTTCATGCTGACACGAAGACAATTCTCCGTAG
				Fc	GAAGGTCGGAGTCAACGGATTGACACGAAGACAATTCTCCGTAA
				R	AAACCATGATTACAATTTAAGAGCC
	A9-57560	In/Del	57560637	Ft	GAAGGTGACCAAGTTCATGCTAAGTTCCTCACTGTGGTTGTTGT
				Fc	GAAGGTCGGAGTCAACGGATTAGTTCCTCACTGTGGTTGTTGG
				R	AACGTTTTGGATGGTCTTAAAGAG
qcC08-2	C8-1 (chrC08_23301569)	SNP	37764827	Ft	GAAGGTGACCAAGTTCATGCTCCTGCCAAAATGTTCAGGGAT
				Fc	GAAGGTCGGAGTCAACGGATTCCTGCCAAAATGTTCAGGGAG
				R	GAATTAAAGCTCATCTGGGAATTTC
	C8-2 (chrC08_23406197)	SNP	37885238	Ft	GAAGGTGACCAAGTTCATGCTGTAGGGCGTTTGGCTCTTTTAT
				Fc	GAAGGTCGGAGTCAACGGATTGTAGGGCGTTTGGCTCTTTTAG
				R	GAAGAACACTTCCATCGGCAC
qcC08-3	C8-3 (chrC08_35071870)	SNP	50874431	Ft	GAAGGTGACCAAGTTCATGCTAGACAGGTGGATGTTGAAACTCTT
				Fc	GAAGGTCGGAGTCAACGGATTGACAGGTGGATGTTGAAACTCTG
				R	GGTAATAAAAACAAAAGTCAAAAGAGAG
	C8-4 (chrC08_36875651)	SNP	53278017	Ft	GAAGGTGACCAAGTTCATGCTGCGAGGAGATTCTGAGGTTGATA
				Fc	GAAGGTCGGAGTCAACGGATTCGAGGAGATTCTGAGGTTGATG
				R	AACCAGATCTTCACGCTCTCTTC
	C8-5 (chrC08_37359680)	SNP	65025203	Ft	GAAGGTGACCAAGTTCATGCTCTTTTGACTCATAGCGGCATACTT
				Fc	GAAGGTCGGAGTCAACGGATTTTTTGACTCATAGCGGCATACTG
				R	ATGACAGCTGGGTGTCTTAGAGC

## Sheet: Table S6
Table S6: Information of SNP genotyping of the eight residual heterozygous lines (RHLs) around RT.A09.
SNP markers	Physical position in Darmor	R4	R19	R26	R41	R48	R78	R159	R183
chrA09_25771114	25771114	0	1	2	1	2	2	2	2
chrA09_26922619	26922619	0	1	2	1	1	0	2	2
chrA09_27032068	27032068	2	1	2	1	1	0	2	2
chrA09_27112968	27112968	2	1	2	1	1	0	2	2
chrA09_27577428	27577428	1	1	1	0	1	-1	1	1
chrA09_27836192	27836192	1	1	1	0	1	1	1	1
chrA09_27889785	27889785	1	1	1	1	1	1	1	1
chrA09_27923669	27923669	1	1	1	1	1	1	1	1
chrA09_27935312	27935312	1	1	1	1	1	1	1	1
chrA09_28041395	28041395	1	1	1	1	1	1	1	1
chrA09_28112275	28112275	1	1	1	1	1	1	1	1
chrA09_28188769	28188769	1	1	1	1	2	1	1	1
chrA09_28221466	28221466	1	1	1	1	2	1	1	1
0: genotype from ZS11; 1: Heterozygous genotype; 2: genotype from 4D122; -1: non detected

## Sheet: Table S7
Table S7: The expression patterns of the 19 candidate genes checked from the BnTIR database (http://yanglab.hzau.edu.cn/BnTIR).
Express organ	BnaA09G0558900ZS	BnaA09G0559000ZS	BnaA09G0559100ZS	BnaA09G0559200ZS	BnaA09G0559300ZS	BnaA09G0559400ZS	BnaA09G0559500ZS	BnaA09G0559600ZS	BnaA09G0559700ZS	BnaA09G0559800ZS	BnaA09G0559900ZS	BnaA09G0560000ZS	BnaA09G0560100ZS	BnaA09G0560200ZS	BnaA09G0560300ZS	BnaA09G0560400ZS	BnaA09G0560500ZS	BnaA09G0560600ZS	BnaA09G0560700ZS
cotyledon_0h	0.01	8.64	12.58	2	3.29	0	13.08	0.09	0	10.3	1.8	5.2	0.03	0	4.3	3.09	0.47	0	0
root	0	0	131.26	11.85	5.57	0.02	3.42	1.64	0	7.88	56.39	9.08	4.65	0	1.03	1.12	0	0	0
vegetative_rosette	0	0	130.34	6.57	6.33	0	1.41	0.55	0	10.22	48.38	8.63	7.44	0	1.84	1.06	0	0	0
upper_stem_peel	0	0.02	179.94	7.38	6.06	0.26	2.17	0.38	0	11.39	67.11	4.06	7.83	0	4.2	1.1	0	0	0.1
middle_stem_peel	0	0	1.6	7.63	1.38	0	0.59	0.04	0	1.26	131.07	0.25	3.46	0	1.56	0.35	0	0	0.05
lower_stem_peel	0	0	1.65	5.95	1.13	0.04	0.71	0.02	0	1.43	138.16	0.23	3.7	0	1.32	0.41	0	0	0.15
leaf_1	0	0	1.03	6.99	1.44	0	0.44	0.04	0	1.77	124.32	0.18	3.32	0	1.79	0.29	0	0	0.05
leaf_2	0	0	1.65	8.66	1.43	0	0.67	0.04	0	1.68	121.27	0.23	3.91	0	1.59	0.14	0	0	0
leaf_3	0	0	2.07	6.72	1.36	0.24	0.41	0	0	1.8	103.83	0.19	3.43	0	1.92	0.26	0	0	0
leaf_4	0	0	1.41	6.01	1.2	0	0.45	0.07	0	1.63	107.44	0.09	3.7	0	2.68	0.23	0	0	0.02
leaf_5	0	0	1.79	7.48	1.48	0.11	0.77	0.07	0	1.86	87.21	0.23	5.09	0	2.6	0.41	0	0	0.05
leaf_6	0	0	1.6	6.61	1.12	0	0.5	0.03	0	1.62	102.14	0.21	3.19	0	2.29	0.24	0	0	0.02
leaf_7	0	0	1.9	6.09	1.42	0.04	0.69	0	0	1.56	73.61	0.29	6.33	0	2.51	0.19	0	0	0
leaf_8	0	0	1.04	5.95	0.98	0	0.52	0.16	0	1.9	96.17	0.18	3.64	0	2.94	0.14	0.14	0	0
leaf_9	0	0	1.25	5.88	1.11	0	0.96	0.1	0	1.8	79.81	0.48	4.17	0	2.21	0.12	0.13	0	0
leaf_10	0	0	0.54	5.9	0.89	0	0.45	0	0	1.63	80.15	0.35	4.37	0	2.96	0.13	0	0	0
leaf_11	0	0	0.44	5.32	1.34	0	0.42	0	0	2.08	73.68	0.08	4.21	0	2.57	0.12	0	0	0
leaf_12	0	0	0.22	5.83	1.35	0	0.14	0.06	0	2.87	65.72	0.07	5.04	0	3.88	0.04	0	0	0
leaf_13	0	0	0.34	5.09	1.36	0	0.45	0	0	2.2	76.58	0.19	3.93	0	2.63	0	0	0	0
leaf_14	0	0	0.26	4.73	1.6	0	0.61	0.03	0	2.44	66.2	0	3.71	0	3.65	0.05	0.12	0	0.19
leaf_15	0	0	0.11	7.08	2.22	0	0.71	0.05	0	3.45	71.97	0.15	1.36	0	3.6	0	0	0	0
leaf_16	0	0	0.12	5.11	1.94	0	0.57	0.09	0	3.53	49.23	0.05	2.97	0	4.02	0	0	0	0
leaf_17	0	0	0.11	5.12	1.41	0	0.45	0.04	0	2	71.66	0.02	2.48	0	1.7	0	0	0	0
leaf_18	0	0	0.16	8.1	2.36	0	0.63	0.08	0	3.88	59.08	0.13	2.55	0	4.72	0.09	0	0	0
leaf_20	0	0	0.11	5.74	1.58	0	0.66	0.22	0	4.86	70.71	0.11	3.6	0	2.24	0.04	0.15	0	0
leaf_21	0	0	0.32	8.9	2.09	0	0.74	0.09	0	5.34	69.33	0.09	2.1	0	4.4	0	0	0	0
leaf_22	0	0	0.05	3.96	1.19	0	0.65	0.07	0	21.53	33.31	0	1.25	0	1.47	0	1.4	0	0
leaf_23	0	0	6.14	27.02	2.5	0.13	1.15	0.08	0	0.51	88.67	0.11	14.78	0	1.4	0.59	0	0	1.13
sepal	0	0	17.9	16.87	2.02	0.51	3.72	0.03	0	0.98	161.65	0.54	0.81	0.14	0.83	0.63	0	0	0.55
petal	0	0	0.21	5.71	11.6	0.1	4.5	0.19	0	2.66	53.06	0	0.5	0.13	0.32	0.04	0.73	0	18.05
filament	0	0	0.12	2.21	1.86	0	4.77	0.04	0.07	7.14	27.02	0.32	1.39	0.34	0.19	0.38	1.17	0	3.56
pollen	0	0	0.02	1.15	0.78	0	2.1	0	0	11.4	11.94	0.1	2.78	1.14	0.91	0.14	1.31	0	0
bud_2mm	0	0	0.02	1.16	0.66	0	2.96	0	0	11.5	3.4	0.21	1.27	2.36	1.04	0	0.1	0	0
bud_4mm	0	0	0.04	1.85	0.15	0	3.28	0.07	0	13.66	4.86	0.41	6.71	1	0.64	0	1.03	0	0
silique_2DAF	0	0	0	0	0.04	0	0.1	0.04	0	9.59	0.34	0.03	52.09	0.13	0.21	0	0	0	0
silique_4DAF	0	0	1.49	3.11	6.56	0	22.36	0	0	1.39	68.99	0.52	0.63	1.7	0.35	0.69	0.06	0	12.4
silique_6DAF	0	0	0.82	4.85	10.01	0.24	8.02	0.06	0	2.12	105.06	0.29	13.1	0	0.34	0.01	0	0	7.62
silique_8DAF	0	0	2.23	7.07	14	0.09	7.79	0.13	0	1.96	120.93	0.56	21.02	0	0.46	0.16	0	0	12.07
silique_10DAF	0	0	2.34	5.95	12.21	0.05	8.51	0.19	0	4.11	158.21	0.27	22.05	0	1.04	0.62	0	0	13.85
silique_12DAF	0	0	3.36	3.84	12.66	0.16	8.89	0.43	0	5.03	149.4	0.19	47.63	0.07	0.88	0.47	0	0	9.11
silique_wall_14DAF	0	0	10.65	3.8	8.41	0.37	7.58	0.51	0	6.48	101.17	0.9	36.66	0	0.96	0.77	0.06	0	6.05
silique_wall_16DAF	0	0	5.97	4.63	9.98	0.63	13.27	0	0	3.51	180.13	0.74	63.45	0	0.42	0.39	0	0	7.16
silique_wall_18DAF	0	0	14.83	1.85	6.34	0.48	9.19	0.08	0	1.3	141.57	0.34	49.39	0	0.12	0.37	0	0	0.25
silique_wall_20DAF	0	0	33.61	2.28	8.02	0.14	6.75	0.07	0	2.4	68.67	0.98	37.53	0	0.05	0.52	0	0	0.04
silique_wall_22DAF	0	0	35.53	2.99	8.46	0.08	3.53	0.1	0	2.9	104.83	1.07	28.06	0	0.04	0.28	0	0	0.24
silique_wall_24DAF	0	0	32.53	4.87	8.07	0.04	4.26	0	0	2.95	176.39	0.86	36.25	0	0.06	0.27	0	0	0.38
silique_wall_26DAF	0	0	28.5	4.89	9.28	0.14	5.09	0.1	0	4.45	154.55	0.63	90.95	0	0.37	0.2	0	0	0.49
silique_wall_28DAF	0	0	27.03	2.72	7.63	0.16	5.92	0.04	0	4.11	123.39	0.39	59.68	0	0.12	0.2	0	0	0.04
silique_wall_30DAF	0	0	26.05	2.38	7.12	0.04	4.29	0.1	0	6.64	150.08	0.28	64.74	0	0.42	0.19	0	0	0.07
silique_wall_32DAF	0	0	31.86	3.82	8.65	0.04	1.68	0.38	0	10.4	146.36	0.3	106.24	0	1.63	0.28	0	0	0.07
silique_wall_34DAF	0	0	23.96	4.82	5.75	0	3.14	0.23	0	14.97	61.84	0.08	104.92	0	0.96	0.07	0.06	0	0.02
silique_wall_36DAF	0	0	40.06	3.75	7.02	0.08	2.64	0	0	9.54	148.84	0.34	139.71	0	0.8	0.04	0	0	0
silique_wall_38DAF	0	0	5.04	3.32	3.81	0	3.9	0.41	0	12.53	101.01	0.03	121.46	0	0.85	0.04	0	0	0
silique_wall_40DAF	0	0	33.67	4.74	5.13	0.04	3.52	0.23	0	13.65	104.46	0	128.24	0	0.93	0	0	0	0.02
silique_wall_42DAF	0	0	0.25	4.01	3.87	0	6.46	0.24	0	6.31	129.61	0.08	49.79	0	0.44	0.03	0	0	0
silique_wall_44DAF	0	0	0.83	3.08	2.29	0	2.81	0.21	0	9.33	67.04	0.03	71.41	0	0.48	0.04	0	0	0
silique_wall_46DAF	0	0	1.3	2.82	3.18	0	3.09	0.09	0	6.28	112.96	0	64.06	0	0.26	0	0	0	0
silique_wall_48DAF	0	0	0.09	1.44	1.67	0	4.39	0.04	0	9.81	54.46	0	10.36	0.06	0.27	0	0	0	0
silique_wall_50DAF	0	0	0.11	2.01	1.89	0	5.52	0.15	0	7.88	51.45	0	29.14	0.14	0.09	0	0	0	0
silique_wall_52DAF	0	0	0.16	2.35	2.33	0	3.89	0.14	0	15.51	48.06	0	22.95	0	0.17	0.04	0	0	0
silique_wall_54DAF	0	0	0.02	2.02	2.17	0	4.65	0.27	0	10.17	47.92	0	8.22	0	0.42	0.03	0	0	0
silique_wall_56DAF	0	0	0.26	4.85	2.38	0	2	0.35	0	13.52	59.71	0.04	24.39	0	0.29	0	0	0	0
silique_wall_58DAF	0	0	0.05	1.8	1.43	0	1.5	0.16	0	13.65	23.36	0	4.51	0	0	0.25	2.46	0	0
silique_wall_60DAF	0	0	0.03	0.83	1.08	0	1.94	0.17	0	8.47	23.07	0.02	3.08	0	0	0	1.62	0	0
seed_14DAF	0	0	0.04	0.49	0.74	0	0.46	0.31	0	23.75	10.64	0.02	5.62	0	0	0	24.73	0	0
seed_16DAF	0	0	5.57	2.3	3.25	0	0.09	1.75	0	11.9	17.85	0.1	17.42	0.35	1.36	0	0	0	9.55
seed_18DAF	0	0	2.82	2.2	5.17	0	0.08	1.5	0.26	13.84	11.08	0	22.33	0.03	1.92	0	0	0	15.75
seed_20DAF	0	0	2.6	3.02	7	0	0.03	0.99	0.66	13.61	11.6	0.03	9.01	0.11	1.56	0	0.26	0	22
seed_22DAF	0	0	3.37	4.13	7.81	0	0.11	1.66	0.22	16.06	14.43	0	7.13	0	2.33	0	0.31	0	24.14
seed_24DAF	0	0	3.63	4.01	9.17	0	0.05	1.26	0.29	14.18	18.18	0.04	4.63	0	2.04	0	0.35	0	26.82
seed_26DAF	0.02	0	2.29	5.67	13.24	0	0.1	0.82	0.72	15.07	20.78	0	3.85	0	4.05	0	1.6	0	25.61
seed_28DAF	0	0	1.68	5.2	15.51	0	0.95	0.67	0.69	11.35	35.38	0	3.71	0.23	3.44	0	4.71	0	16.81
seed_30DAF	0	0	2.39	4.46	15.32	0	0.77	0.99	0.59	9.69	35.85	0	2.26	0.29	3.05	0	7.16	0	10.05
seed_32DAF	0	0	1.21	3.69	17.81	0	2	0.66	0.49	7.49	36.65	0	9.15	0.07	1.11	0.04	1.79	0	7.63
seed_34DAF	0	0	2.19	3.9	17.73	0.04	1.93	0.34	0.53	6.56	31.38	0	5.51	0.21	1.82	0	8.91	0	2.4
seed_36DAF	0	0.04	2.09	1.64	12.43	0	2.52	0.24	0.19	4.69	37.36	0	9.35	0.22	1.04	0.06	4.41	0	3.2
seed_38DAF	0	0.31	2.02	1.38	6.62	0	1.07	0.12	0	4.63	17.2	0	42.06	0	1.33	0	2.31	0	0
seed_40DAF	0	0.21	1.98	1.68	8.36	0	1.32	0.3	0.12	3.83	25.72	0	13.02	0	0.72	0.03	2.19	0	0.32
seed_42DAF	0	0.37	1.1	1.38	3.84	0	0.56	0.03	0.11	3.41	12.7	0	53.8	0.12	1.27	0	1.58	0	0.02
seed_44DAF	0	0.13	1.35	1.28	3.87	0	0.8	0.38	0.13	4.25	11.99	0.02	38.43	0	1.36	0	1.32	0	0
seed_46DAF	0	0.34	1.15	0.92	4.64	0	0.64	0.09	0.07	3.23	8.85	0	69.06	0.34	1.14	0	0.5	0	0
seed_48DAF	0	1.31	1.06	1.4	3.76	0	0.58	0.5	0.06	3.58	4.22	0.03	232.13	0.14	0.91	0	0.71	0	0
seed_50DAF	0	2.87	1.03	0.91	3.52	0	1.01	0.23	0.05	3.95	1.75	0	372.16	0.14	1.03	0	0.5	0	0
seed_52DAF	0	2.14	0.75	0.75	2.44	0	0.64	0.15	0.03	3.85	1.72	0	268.21	0.12	1.51	0	0.93	0	0
seed_54DAF	0	1.16	0.67	0.7	1.27	0	0.79	0.08	0.07	3	1.08	0	153.12	0.08	1.59	0	0.8	0	0
seed_56DAF	0	0.08	0.87	0.17	0.35	0	0.14	0.07	0	2.21	0.43	0	126.64	0.22	1.11	0	0	0	0
seed_58DAF	0	0	0.62	0.18	1.03	0	0.48	0	0.09	0.87	1.35	0	0.01	0.2	1.59	0	0	0	0
seed_60DAF	0	0	0.56	0.3	0.72	0	0.45	0.02	0.04	0.66	0.97	0.03	0.07	0.12	1.88	0	0	0	0
seed_62DAF	0	0	0.48	0.13	0.52	0	0.21	0.2	0.06	0.8	1.13	0	0.04	0.01	0.85	0	0	0	0
seed_64DAF	0	0	0.64	0.24	0.71	0	0.47	0.17	0.03	0.43	1.12	0	0.02	0.2	1.15	0	0	0	0

## Sheet: Table S8
Table S8: The primers used for qRT-PCR in this study
Gene ID	Left primer	Right primer
BnaA09G0559100ZS	5' GCTAAACCGAAGATAAAGCCCGT 3'	5' ACTACTGTCATCGTTGATTTCTC 3'
BnaA09G0559200ZS	5' TGCTATTGGTGTTAGACGCCATG 3'	5' CCAATGCTCCTGCAAGAACCTGA 3'
BnaA09G0559300ZS	5' TGCCTGCTTCAGTTATCTCTAGT 3'	5' GCTTCATAGCTTCCATATACTTG 3'
BnaA09G0559500ZS	5' ACCACCACAACAAGGCCAAACGC 3'	5' ATTGGAATGTGAAGGTAAAGGTG 3'
BnaA09G0559600ZS	5' GACCATAATCAGGAATTGGACGC 3'	5' TGCAACTCAAGAAGATGCTACAA 3'
BnaA09G0559800ZS	5' CGGAAAATGGATGTGAACGTCGA 3'	5' GGATCTAGATCGGTTCCTCTCGG 3'
BnaA09G0559900ZS	5' GACGTGTGCGTACCATCCAAAGC 3'	5' GACCACCAAACACAGACTCCAAA 3'
BnaA09G0560000ZS	5' GGAGAGGTCACTCATCAGAAAAG 3'	5' TGTTTGACCTATTATCCTCTCCT 3'
BnaA09G0560100ZS	5' AAACCACTCAAACTCGTGCATAA 3'	5' GAGTTCTCGGTTCTTGGTTCGGA 3'
BnaA09G0560300ZS	5' ACGAAGATTTGTTGTCCCTGTTT 3'	5' GGTTATGGCTATTACGATGATGA 3'
BnaA09G0560400ZS	5' TTGGTCGGTGTAGTGTTGTTGAG 3'	5' TTCATCCTCCAATCTTCGCCGAC 3'
